# Supplementary material for: ClassyFire: automated chemical classification with a comprehensive, computable taxonomy
Source: PubMed Central journal article supplement (PMC5096306; doi:10.1186/s13321-016-0174-y), 2016-11-04
Supplement: 13321_2016_174_MOESM6_ESM.pdf [file 13321_2016_174_MOESM6_ESM.pdf]

A)

ClassyFire

Browse ▾

Classify

About ClassyFire

Contact

Advanced Search

Help ▾

Search

entities ▾

Search

## Advanced Search

**Advanced search** provides a powerful interface for searching the database. You can build up queries that support a wide range of conditions and predicates. **To get started, click the "Add Search Condition" button to select your first field.**

### **i** Tips:

- If you add a condition but don't enter anything into the search for that condition, *no search will be applied but the field will show up in the results.* This allows you to include fields you might be interested in seeing but not searching.
- You can do wildcard matching using an asterix (\*) at the beginning or end of search terms. For example try *alph\** or *\*andrene\**.
- Searching for more than one term (for example *ascorbic acid*) will match anything containing either one of the terms (anything matching *ascorbic* **OR** *acid*). To limit it to exact matches, use quotes around your search, for example, "*ascorbic acid*".
- Note that you can change the query to match **ANY** conditions. The default is to match **ALL** conditions (results will only be displayed if every field is a match)

Match  of the conditions below:

|                                                       |                                           |                                        |                                  |
|-------------------------------------------------------|-------------------------------------------|----------------------------------------|----------------------------------|
| <input type="text" value="Parents"/>                  | <input type="text" value="contains"/>     | <input type="text" value="Alkaloids"/> | <input type="button" value="✕"/> |
| <input type="text" value="Ring count"/>               | <input type="text" value="greater than"/> | <input type="text" value="1"/>         | <input type="button" value="✕"/> |
| <input type="text" value="Mass"/>                     | <input type="text" value="less than"/>    | <input type="text" value="700"/>       | <input type="button" value="✕"/> |
| <input type="button" value="+ Add Search Condition"/> |                                           |                                        |                                  |

Search

Clear

B)

## Search Results

Export

Displaying matches 1 - 30 of 85 in total

1 2 3 Next » Last »

SLRCCWJSBJZJBV-UHFFFAOYSA-N

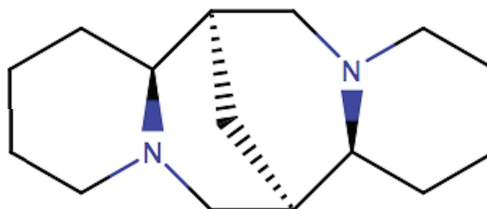

| Field      | Value                                                                                                                                                                                                                                                                                                                                                           |
|------------|-----------------------------------------------------------------------------------------------------------------------------------------------------------------------------------------------------------------------------------------------------------------------------------------------------------------------------------------------------------------|
| Parents    | Quinolizidines, Chemical entities, Organic compounds, Organoheterocyclic compounds, Piperidines, Trialkylamines, Organic nitrogen compounds, Organonitrogen compounds, Amines, Tertiary amines, Azacyclic compounds, Organopnictogen compounds, Hydrocarbon derivatives, Sparteine, lupanine, and related alkaloids, Alkaloids and derivatives, Lupin alkaloids |
| Ring count | 4                                                                                                                                                                                                                                                                                                                                                               |
| Mass       | 234.387                                                                                                                                                                                                                                                                                                                                                         |
